# Supplementary material for: Pilot Trial of Combined BRAF and EGFR Inhibition in BRAF -Mutant Metastatic Colorectal Cancer Patients
Source: Oxford University Press journal article supplement (doi:10.1158/1078-0432.ccr-14-2779), 2015-01-15
Supplement: 10780432ccr142779-sup-140123_1_supp_2780786_ngfcfh.docx [file 10780432ccr142779-sup-140123_1_supp_2780786_ngfcfh.docx]

| **Patient** | **Genetic alterations identified** | **Best response to vemurafenib/panitumumab** |
| --- | --- | --- |
| 1 | | BRAF | V600E | | --- | --- | | PIK3CD | C991F | | ALK | V1471L | | FGFR3 | V390L | | INPP4B | Q13H | | RICTOR | D913G | | TNFAIP3 | S649F | | TNFAIP3 | S667I | | RECQL4 | R365Q | | RET | N834S | | PIK3C2G | E1400fs | | RAD51B | R8X | | TP53 | C238W | | RNF43 | P385fs | | JAK3 | H514Q | | JAK3 | F359L | | PTPRT | A293T | | PR |
| 2 | | BRAF | V600E | | --- | --- | | CTNNB1 | K335I | | ARID1B | L1919Q | | TP53 | 196_202del | | RNF43 | G659fs | | DOT1L | R674C | | PR |
| 3 | | BRAF | V600E | | --- | --- | | TP53 | C176Y | | SMAD4 | R361C | | SPEN | K2205T | | IL7R | P197L | | PTPRS | E1525K | | SD |
| 4 | | BRAF | V600E | | --- | --- | | TP53 | R306X | | AKT3 | R270H | | ATM | V2617I | | BRIP1 | R658Q | | CDC71 | K47N | | DNMT3A | R167W | | JAK3 | D519E | | PARP1 | T361N | | PTEN | R173C | | PTPRS | R714H | | RICTOR | W750X | | SMAD4 | A118V | | SOX17 | G103C | | TSHR | T762M | | FOXL2 | H291R | | SD |
| 5 | | BRAF | V600E | | --- | --- | | PIK3CA | E545K | | TP53 | P250L | | APC | T1556fs | | APC | R213fs | | ATRX | Q2452L | | FGFR1 | P181S | | MEF2B | Q18K | | HIST1H3B | R54fs | | SD |
