# Supplementary material for: Pilot Trial of Combined BRAF and EGFR Inhibition in BRAF -Mutant Metastatic Colorectal Cancer Patients
Source: Oxford University Press journal article supplement (doi:10.1158/1078-0432.ccr-14-2779), 2015-01-15
Supplement: 10780432ccr142779-sup-140123_1_supp_2780787_ngfcff.xlsx [file 10780432ccr142779-sup-140123_1_supp_2780787_ngfcff.xlsx]

## Sheet: Sheet1
Supplemental Table 1. Genes in the IMPACT assay
ABL1	BLM	CIC	ERCC3	GATA2	JAK1	MLL	PAK7	PTPN11	SDHAF2	TGFBR1
AKT1	BMPR1A	CREBBP	ERCC4	GATA3	JAK2	MLL2	PALB2	PTPRD	SDHB	TGFBR2
AKT2	BRAF	CRKL	ERCC5	GNA11	JAK3	MLL3	PARK2	PTPRS	SDHC	TMEM127
AKT3	BRCA1	CRLF2	ERG	GNAQ	JUN	MPL	PARP1	PTPRT	SDHD	TMPRSS2
ALK	BRCA2	CSF1R	ESR1	GNAS	KDM5A	MRE11A	PAX5	RAC1	SETD2	TNFAIP3
ALOX12B	BRD4	CTCF	ETV1	GREM1	KDM5C	MSH2	PBRM1	RAD50	SF3B1	TNFRSF14
APC	BRIP1	CTLA4	ETV6	GRIN2A	KDM6A	MSH6	PDCD1	RAD51	SH2D1A	TOP1
AR	BTK	CTNNB1	EZH2	GSK3B	KDR	MTOR	PDGFRA	RAD51B	SHQ1	TP53
ARAF	CARD11	CUL3	FAM123B	H3F3C	KEAP1	MUTYH	PDGFRB	RAD51C	SMAD2	TP63
ARID1A	CASP8	DAXX	FAM175A	HGF	KIT	MYC	PDPK1	RAD51D	SMAD3	TRAF7
ARID1B	CBFB	DCUN1D1	FAM46C	HIST1H1C	KLF4	MYCL1	PHOX2B	RAD52	SMAD4	TSC1
ARID2	CBL	DDR2	FANCA	HIST1H2BD	KRAS	MYCN	PIK3C2G	RAD54L	SMARCA4	TSC2
ARID5B	CCND1	DICER1	FANCC	HIST1H3B	LATS1	MYD88	PIK3C3	RAF1	SMARCB1	TSHR
ASXL1	CCND2	DIS3	FAT1	HNF1A	LATS2	MYOD1	PIK3CA	RARA	SMARCD1	U2AF1
ASXL2	CCND3	DNMT1	FBXW7	HRAS	LMO1	NBN	PIK3CB	RASA1	SMO	VHL
ATM	CCNE1	DNMT3A	FGF19	ICOSLG	MAP2K1	NCOR1	PIK3CD	RB1	SOCS1	VTCN1
ATR	CD274	DNMT3B	FGF3	IDH1	MAP2K2	NF1	PIK3CG	RBM10	SOX17	WT1
ATRX	CD276	DOT1L	FGF4	IDH2	MAP2K4	NF2	PIK3R1	RECQL4	SOX2	XIAP
AURKA	CD79B	E2F3	FGFR1	IFNGR1	MAP3K1	NFE2L2	PIK3R2	REL	SOX9	XPO1
AURKB	CDC73	EED	FGFR2	IGF1	MAP3K13	NKX2-1	PIK3R3	RET	SPEN	YAP1
AXIN1	CDH1	EGFL7	FGFR3	IGF1R	MAPK1	NKX3-1	PIM1	RFWD2	SPOP	YES1
AXIN2	CDK12	EGFR	FGFR4	IGF2	MAX	NOTCH1	PLK2	RHOA	SRC
AXL	CDK4	EIF1AX	FH	IKBKE	MCL1	NOTCH2	PMAIP1	RICTOR	STAG2
B2M	CDK6	EP300	FLCN	IKZF1	MDC1	NOTCH3	PMS1	RIT1	STK11
BAP1	CDK8	EPCAM	FLT1	IL10	MDM2	NOTCH4	PMS2	RNF43	STK40
BARD1	CDKN1A	EPHA3	FLT3	IL7R	MDM4	NPM1	PNRC1	ROS1	SUFU
BBC3	CDKN1B	EPHA5	FLT4	INPP4A	MED12	NRAS	POLE	RPS6KA4	SUZ12
BCL2	CDKN2A	EPHB1	FOXA1	INPP4B	MEF2B	NSD1	PPP2R1A	RPS6KB2	SYK
BCL2L1	CDKN2B	ERBB2	FOXL2	INSR	MEN1	NTRK1	PRDM1	RPTOR	TBX3
BCL2L11	CDKN2C	ERBB3	FOXP1	IRF4	MET	NTRK2	PRKAR1A	RUNX1	TERT
BCL6	CHEK1	ERBB4	FUBP1	IRS1	MITF	NTRK3	PTCH1	RYBP	TET1
BCOR	CHEK2	ERCC2	GATA1	IRS2	MLH1	PAK1	PTEN	SDHA	TET2
